# Supplementary material
Source: PubMed Central journal article supplement (PMC3182728)
Supplement: 1103015108_pnas.201103015SI.pdf [file 1103015108_pnas.201103015SI.pdf]

# Supporting Information

Tang et al. 10.1073/pnas.1103015108

## SI Materials and Methods

**CatchER Biosensor Family Design Strategy.** Based on key determinants for fine-tuning  $\text{Ca}^{2+}$  binding affinity and  $\text{Ca}^{2+}$ -induced conformational changes and the established chromophore properties of FPs, we hypothesized that  $\text{Ca}^{2+}$  sensors with a fast fluorescence response could be better designed by coupling  $\text{Ca}^{2+}$  binding sites directly to the chromophore rather than relying on stretched protein-protein interaction to modulate chromophore conformation. Our computationally assisted design is based on the following criteria and considerations. First, it requires four or five oxygen ligand atoms from protein residues (typically carboxyl groups of D, E, N, and Q) situated in the spherical geometry characteristic of natural  $\text{Ca}^{2+}$  binding proteins (1–5). Second, appropriate choice of residue charge and type can be made to fine-tune  $\text{Ca}^{2+}$  binding affinity and metal selectivity (6, 7). Third, diffusion-limited access of  $\text{Ca}^{2+}$  to the site requires good solvent accessibility (8). Fourth, propagating  $\text{Ca}^{2+}$ -induced local conformational and electrostatic changes to the chromophore can be achieved by properly locating the charged ligand residues with respect to the chromophore (9, 10). Fifth, these changes must occur rapidly, more quickly than the rate of conversion from a neutral to anionic state ascribed to these chromophores (11, 12). Sixth, the created binding site must not interfere with the chromophore's synthesis and formation. The EGFP variant with the M153T/V163A mutation (cycle 2) was chosen as the scaffold protein because of its high fluorescence intensity, folding efficiency, and thermostability (13).

**Plasmid construction, protein expression, and purification.** Bacterial expression plasmids for EGFP variants D8 to D12 were constructed by site-directed mutagenesis on cycle 2 EGFP (F64L/S65T/M153T/V163A) inserted in the pET28a vector (EMD Biosciences) between the BamHI and EcoRI restriction enzyme cleavage sites. The DNA sequence of the designed EGFP variants between these two restriction sites was cleaved and inserted into pcDNA3.1+ vector (Invitrogen). The calreticulin ER targeting sequence MLLSVPLLLGLLGLAAAD and ER retention sequence KDEL were added to the N and C termini, respectively, to construct the mammalian cell expression plasmids. EGFP variants were bacterially expressed in *Escherichia coli* BL21(DE3) following reported methods (11, 14).

**Characterization of the optical properties of purified EGFP variants.** The absorption spectra of EGFP variants were measured with a Shimadzu UV-1601 spectrophotometer. The protein concentration was determined at an absorption maximum of 280 nm with the coefficient  $21,890 \text{ cm}^{-1} \cdot \text{M}^{-1}$  (11), and fluorescence spectra were determined (Photon Technology International, Inc.).

**Cell culture and DNA transfection.** C2C12 myoblasts were cultured in DMEM containing 4.5 g/L glucose (high glucose) with 2 mM L-glutamine plus 1.5 g/L sodium bicarbonate. CatchER plasmid DNA was transfected into these myoblasts by incubating the mixture of DNA and Lipofectamine 2000 at a ratio of 1:2 in Opti-MEM (Invitrogen) solution at 37 °C for 4 h. The transfection complex was replaced with fresh DMEM. Transfected cells were incubated at 30 °C and imaged after 48 or 72 h. A similar protocol was applied to HeLa, HEK-293, and BHK-21 cells.

**Real-time fluorescence imaging.** Real-time cell imaging was conducted on an inverted fluorescence microscope (DMI6000 B; Leica) with a cooled EM-CCD camera (C9100; Hamamatsu). The single-wavelength sensor was excited at 488 nm by a Xenon lamp (Polychrome V system; TILL PHOTONICS), with an HQ480/20× excitation filter, a 515DCXR dichromatic mirror, and a D535/25 emission filter (Chroma Technology Corporation). Fura-2 was excited alternatively at 340 nm with a D340xv2 excitation filter and

at 380 nm with a D380xv2 filter, a 400DCLP dichromatic mirror, and a D510/80 emission filter. A perfusion system was used for drug application and solution exchange. Cells were imaged at 70% confluence. Intact cell imaging was conducted in Ringer buffer (121 mM NaCl, 2.4 mM  $\text{K}_2\text{HPO}_4$ , 0.4 mM  $\text{KH}_2\text{PO}_4$ , 1 mM  $\text{Mg}^{2+}$ , 10 mM Hepes) with or without 1.8 mM  $\text{CaCl}_2$ . Cells were permeabilized with 25  $\mu\text{M}$  digitonin for 3–5 min and imaged in intracellular buffer (125 mM KCl, 25 mM NaCl, 10 mM Hepes, 0.5 mM  $\text{Na}_2\text{ATP}$ , 0.2 mM  $\text{MgCl}_2$ , 200  $\mu\text{M}$   $\text{CaCl}_2$ , 500  $\mu\text{M}$  EGTA). The final amount of free  $[\text{Ca}^{2+}]$  was 100 nM (pH 7.25).

**In situ measurement of CatchER's  $\text{Ca}^{2+}$  dissociation constant.** CatchER's  $\text{Ca}^{2+}$   $K_d$  was measured in BHK and C2C12 cells. ER  $\text{Ca}^{2+}$  in BHK cells was depleted by applying 100  $\mu\text{M}$  histamine and 5  $\mu\text{M}$  thapsigargin in Ringer 0  $\text{Ca}^{2+}$  buffer. Cells were permeabilized in 100  $\mu\text{M}$  digitonin in intracellular-like solution containing 140 mM KCl, 10 mM NaCl, 1 mM  $\text{MgCl}_2$ , 20 mM Hepes (pH 7.25) (15). Calibration buffers were prepared by adding  $\text{Ca}^{2+}$  to the intracellular-like solution, reaching final concentrations of 0.05, 0.1, 0.5, 1, 5, and 10 mM, and 200  $\mu\text{M}$  EGTA buffer. Fluorescence at the lowest  $\text{Ca}^{2+}$  ( $F_{\min}$ ) and that at the highest  $\text{Ca}^{2+}$  ( $F_{\max}$ ) were determined in 200  $\mu\text{M}$  EGTA and 10 mM  $\text{Ca}^{2+}$  with no  $\text{Ca}^{2+}$  ionophore, respectively.

Similar in situ  $K_d$  calibration was conducted in C2C12 myoblasts. ER  $\text{Ca}^{2+}$  of permeabilized cells was depleted in intracellular buffer containing 10  $\mu\text{M}$   $\text{IP}_3$  and 2  $\mu\text{M}$  thapsigargin. For calibration, 1, 3, 10, and 20 mM  $\text{Ca}^{2+}$  buffers were applied in the presence of 5  $\mu\text{M}$  ionomycin.  $F_{\min}$  and  $F_{\max}$  were determined in 3 mM EGTA and 20 mM  $\text{Ca}^{2+}$ , respectively.

Fluorescence was normalized according to the equation:

$$f = \frac{F - F_{\min}}{F_{\max} - F_{\min}}$$

and  $K_d$  was determined by the Hill equation:

$$f = \frac{[\text{Ca}^{2+}]^n}{K_d + [\text{Ca}^{2+}]^n}$$

$K_d$  was  $1.07 \pm 0.26$  mM ( $0.90 \pm 0.19$  Hill coefficient) in BHK-21 cells and  $1.09 \pm 0.20$  mM ( $0.94 \pm 0.17$  Hill coefficient) in C2C12 cells.

**Kinetic Analysis of  $\text{Ca}^{2+}$  Binding to CatchER by Stopped Flow.** The fluorescence kinetics of bacterially expressed CatchER were investigated using an SF-61 stopped-flow spectrofluorometer (10-mm path length, 2.2-ms dead time at room temperature; Hi-Tech Scientific) at 22 °C. Fluorescence intensity changes were recorded with a 455-nm long-pass filter with excitation at 395 nm. Equal volumes of  $\text{Ca}^{2+}$ -free protein in 10 mM Tris-Cl (pH 7.4) and  $\text{Ca}^{2+}$  in the same buffer were mixed in the stopped-flow spectrofluorometer, yielding final concentrations of 10  $\mu\text{M}$  CatchER and 50, 100, 200, 300, 500, and 1000  $\mu\text{M}$   $\text{Ca}^{2+}$ . The stopped-flow traces were fit to Eq. S1, which describes  $F$ , the fluorescence intensity, at any given time;  $F_{\infty}$ , the fluorescence at infinite time;  $\Delta F$ , the amplitude of the fluorescence change;  $k_{\text{obs}}$ , the observed rate constant; and  $t$ , the time.

$$F = F_{\infty} - \Delta F \exp(-k_{\text{obs}} \cdot t) \quad \text{[S1]}$$

$$F = F_{\infty} + \Delta F \exp(-k_{\text{obs}} \cdot t) \quad \text{[S2]}$$

$$k_{obs} \cdot \tau = \ln 2 \quad [\text{S3}]$$

**Apparent  $pK_a$  determination by pH profile.** The apparent  $pK_a$  of  $\text{Ca}^{2+}$ -free or  $\text{Ca}^{2+}$ -loaded CatchER was determined with bacterially expressed protein by fitting the fluorescence intensity change at 510 nm ( $\lambda_{ex} = 488/395$  nm). Protein (5  $\mu\text{M}$ ) was dissolved in different buffers, with pH ranging from 4.5 to 9.5 in the presence of either 10  $\mu\text{M}$  EGTA (apo) or 4 mM  $\text{Ca}^{2+}$  (holo), and the actual pH was determined after measuring fluorescence. The proposed interaction scheme is

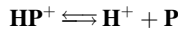

$$pH = pK_a + \log \frac{[P]}{[HP^+]} \quad [\text{S4}]$$

$$f = \frac{F - F_{\min}}{F_{\max} - F_{\min}} \quad [\text{S5}]$$

$$F_{\min} = [P]_T c_1 \quad [\text{S6}]$$

$$F_{\max} = [P]_T c_2 \quad [\text{S7}]$$

$$F = ([P]_T - [P])c_1 + [P]c_2 \quad [\text{S8}]$$

$$f = \frac{[P]_T c_1 - [P]c_1 + [P]c_2 - [P]_T c_1}{[P]_T c_2 - [P]_T c_1} = \frac{[P]}{[P]_T} \quad [\text{S9}]$$

$$\frac{[P]}{[HP^+]} = \frac{1}{1/f - 1} \quad [\text{S10}]$$

$$f = \frac{1}{1 + \exp\left(\frac{pK_a - pH}{c}\right)} \quad [\text{S11}]$$

$\text{H}^+$  is the proton;  $\text{P}$  is the CatchER protein;  $f$  is the normalized  $\Delta F$  change;  $[P]_T$  is the total protein concentration;  $c_1$  or  $c_2$  is the extinction coefficient of  $\text{HP}^+$  or  $\text{P}$  fluorescence, respectively;  $F$  is the real-time fluorescence (fluorescence intensity);  $F_{\min}$  is the fluorescence at the lowest pH;  $F_{\max}$  is the fluorescence at the highest pH; and  $c$  is a constant for adjustment. The value theoretically equals  $\log e$ . The apparent  $pK_a$ , fitted by a single exponential (Eq. S11), was  $7.59 \pm 0.03$  and  $6.91 \pm 0.03$  for apo and holo forms excited at 488 nm and  $7.14 \pm 0.02$  and  $6.95 \pm 0.06$  for apo and holo forms excited at 395 nm, respectively.

**CatchER/ $\text{Ca}^{2+}$  stoichiometry studied by the Job Plot.** The stoichiometry of the CatchER and  $\text{Ca}^{2+}$  interaction was determined at the maximal relative amount of  $\text{Ca}^{2+}$ -bound CatchER in the Job Plot (16).  $\text{Ca}^{2+}$ -free and -bound [CatchER] were converted to fluorescence intensity following the equation:  $F = S_f \cdot C_f + S_b \cdot C_b$ , where  $F$  is the apparent fluorescence intensity;  $S_f$  and  $S_b$  are the coefficients of  $\text{Ca}^{2+}$ -free and -bound CatchER, respectively; and  $C_f$  and  $C_b$  are the concentrations of  $\text{Ca}^{2+}$ -free and -bound CatchER, respectively. The relative amount of  $\text{Ca}^{2+}$ -bound CatchER ( $C_b \cdot V$ ,  $V = 1$ ) was calculated using Eq. S12. Fluorescence emission ( $\lambda_{ex} = 488/395$  nm) and absorbance spectra were recorded with [CatchER]: 28.7, 23.3, 19.4, 15.1, and 11.6  $\mu\text{M}$  in response to  $[\text{Ca}^{2+}]$ : 11.3, 16.7, 20.6, 24.9, and 28.4  $\mu\text{M}$ , respectively.

$$\begin{aligned} \frac{F_{\text{Ca}^{2+}\text{-bound}}}{F_{\text{Ca}^{2+}\text{-free}}} &= \frac{S_f \cdot C_f + S_b \cdot C_b}{S_f \cdot C_T} = \frac{S_f (C_T - C_b) + S_b \cdot C_b}{S_f \cdot C_T} \\ &= 1 + \frac{C_b \cdot (S_b - S_f)}{S_f \cdot C_T} \end{aligned} \quad [\text{S12}]$$

$$a = \frac{S_b - S_f}{S_f} \quad [\text{S13}]$$

$$\frac{C_b}{C_T} \cdot a = \frac{F_{\text{Ca}^{2+}\text{-bound}}}{F_{\text{Ca}^{2+}\text{-free}}} - 1 \quad [\text{S14}]$$

$$C_b \cdot V = \left( \frac{F_{\text{Ca}^{2+}\text{-bound}}}{F_{\text{Ca}^{2+}\text{-free}}} - 1 \right) \cdot \frac{C_T}{a} \quad [\text{S15}]$$

**NMR spectroscopy.** All NMR experiments were performed at 37 °C using a Varian 800- or 600-MHz spectrometer. Typically, NMR samples contained 0.3 mM  $^{15}\text{N}$ - or  $^{13}\text{C}$ ,  $^{15}\text{N}$ -labeled protein in 10 mM Tris, 10 mM KCl, 10% (vol/vol)  $\text{D}_2\text{O}$  (pH 7.4). Data were processed using NMRpipe (17) and analyzed with the program Sparky (T. D. Goddard and D. G. Kneller, University of California, San Francisco). For backbone assignment of  $^1\text{H}$ ,  $^{13}\text{C}$ , and  $^{15}\text{N}$  resonances, an experiment correlating the amide  $^1\text{H}$  and  $^{15}\text{N}$  chemical shifts with the intrareidue  $^{13}\text{C}\alpha$  (HNCA) was collected on a Varian Inova 800-MHz spectrometer, and an experiment correlating  $^{13}\text{C}\beta$  and  $^{13}\text{C}\alpha$  resonances of a residue with the  $^{15}\text{N}$  and  $^1\text{H}$  resonances of the following residue [CBCA(CO)NH] was collected on a Varian Inova 600-MHz spectrometer, both equipped with a cryogenic probe. For  $\text{Ca}^{2+}$  titration,  $\{^1\text{H}, ^{15}\text{N}\}$  HSQC spectra were collected and chemical shift perturbations were calculated using the equation  $\Delta\delta_{av} = \{0.5 [\Delta\delta(^1\text{H}^{\text{N}})^2 + (0.2 \Delta\delta(^{15}\text{N}))^2]\}^{1/2}$ , where  $\Delta\delta$  is the change in chemical shift between the apo and  $\text{Ca}^{2+}$ -loaded forms. Rotational correlation time ( $\tau_c$ ) was measured using a shared, constant-time, cross-correlated relaxation pulse sequence developed by the Prestegard laboratory (18). In this measurement, a series of highly sensitive HSQC spectra were collected at relaxational acquisition times from 0 to  $\sim 100$  ms. Residue-specific  $\tau_c$  values were then extracted from the exponential decay rates (19).  $T_1$  and  $T_2$  were collected on a Varian Inova 600-MHz spectrometer. Integrations of peak collected at 0, 30, 60, 100, 240, 480, 720, 1,000, and 1,500 ms ( $T_1$ ) and 10, 30, 50, 70, 90, 110, 130, and 150 ms ( $T_2$ ) were fitted with  $I = I_0 \exp(-t/T_{1/2})$ , where  $I_0$  is the intensity at zero decay and  $t$  is the relaxation decay. The  $\tau_c$  values were calculated based on the following equations:

$$\tau_c = (2\omega_N)^{-1} \cdot \sqrt{(6T_1/T_2 - 7)} \quad [\text{S16}]$$

$$\omega_N = 2\pi f_N \quad [\text{S17}]$$

**Adult mouse myofiber electrophysiological and optical recordings.** Single skeletal muscle fibers from the flexor digitorum brevis (FDB) were obtained from Freund Virus B (FVB) mice raised in the Animal Research Program of Wake Forest University School of Medicine (WFUSM) at 3–5 mo (young) or 22–25 mo (old). They were killed by cervical dislocation. Animal handling followed a protocol approved by the WFUSM Animal Care and Use Committee.

The pcDNA3.1 plasmid carrying CatchER was electroporated in vivo into the FDB muscle. FDB fibers were enzymatically dissociated 3 to 4 wk after muscle electroporation, as described elsewhere (20). Solutions used for whole-cell patch-clamp and field stimulation recordings are described elsewhere (21, 22). High EGTA (20 mM) was used in the pipette solution to reproduce experimental conditions in a series of studies on FDB muscle fibers in which SR  $\text{Ca}^{2+}$  release was recorded in the cytosol (21). For field stimulation recordings, FDB fibers were

loaded with 250  $\mu\text{M}$  EGTA. These procedures prevent Rhod-2 saturation without modifying SR  $\text{Ca}^{2+}$  kinetics release (data not shown). Fluorescence signals were recorded using a Radiance 2100 (Bio-Rad, Zeiss) confocal system in the line-scan mode and converted to intensity profiles using ImageJ software (National Institutes of Health).

**CatchER calibration in FDB fibers.** CatchER fluorescence was transformed into  $\text{Ca}^{2+}$  concentration according to the equation  $[\text{Ca}^{2+}]_i = K_d(F - F_{\min})/(F_{\max} - F)$  (23). The  $K_d$  value was calculated in enzymatically dissociated FDB fibers, as reported (25), with some modifications. Fibers from young and old mice expressing CatchER were exposed to 0.01% saponin for  $\sim 2$  min in a solution containing 90 mM K-glutamate, 1.02 mM  $\text{MgCl}_2$ , 5 mM NaCl, 10 mM Hepes, 1 mM 1,2-bis(*o*-aminophenoxy)ethane-*n,n,n',n'*-tetraacetic acid (BAPTA), 0.323 mM  $\text{CaCl}_2$ , 0.025 *N*-benzyl-*p*-toluene sulphonamide (BTS), 2% (vol/vol) poly (*N*-vinyl-2-pyrrolidone) (PVP) (1 mM free  $\text{Mg}^{2+}$ , 0.0001 mM free  $\text{Ca}^{2+}$ ) (pH 7.2), adjusted with KOH. The permeabilized myofiber was exposed to  $10^{-6}$  M ionomycin diluted in the pre-

vious solution to equilibrate various free  $\text{Ca}^{2+}$  concentrations among the extracellular space, cytosol, and lumen of the SR. For all solutions, free  $[\text{Mg}^{2+}]$  was set at 1 mM and free  $[\text{Ca}^{2+}]$  was set at concentrations ranging from  $10^{-7}$  to  $10^{-1}$  M by buffering with BAPTA, as calculated by the Max-Chelator program. CatchER's  $F_{\min}$  and  $F_{\max}$  were measured in each fiber for which we reported the SR resting  $\text{Ca}^{2+}$  concentration. CatchER's  $K_d$  measured in FDB fibers from young and old mice was  $1.66 \pm 0.08$  mM and  $1.71 \pm 0.12$  mM, respectively. Fluorescence recorded after fiber exposure to 0.01% saponin in 100 nM  $\text{Ca}^{2+}$  solution (no ionomycin added), pCa ( $-\log[\text{Ca}^{2+}]$ ) 7 plus ionomycin, or pCa 1 plus ionomycin was considered to calculate resting fluorescence ( $F_{\text{rest}}$ ),  $F_{\text{max}}$ , and  $F_{\min}$ , respectively. The  $F_{\min}$  value was confirmed by adding 1 mM 4-CmC to fibers incubated in 100 nM  $\text{Ca}^{2+}$  plus ionomycin. The ratio between the fluorescence recorded in the presence of cresol and 100 nM  $\text{Ca}^{2+}$  plus ionomycin was  $1.06 \pm 0.01$  ( $n = 5$ ). Fibers were imaged in the x-y mode of the confocal microscope 1 min after solution exchange or until SR fluorescence reached a steady value.

- Khan F, Stott K, Jackson S (2003)  $^1\text{H}$ ,  $^{15}\text{N}$  and  $^{13}\text{C}$  backbone assignment of the green fluorescent protein (GFP). *J Biomol NMR* 26:281–282.
- Yang W, et al. (2003) Rational design of a calcium-binding protein. *J Am Chem Soc* 125:6165–6171.
- Kirberger M, et al. (2008) Statistical analysis of structural characteristics of protein  $\text{Ca}^{2+}$ -binding sites. *J Biol Inorg Chem* 13:1169–1181.
- Wang X, Kirberger M, Qiu F, Chen G, Yang JJ (2009) Towards predicting  $\text{Ca}^{2+}$ -binding sites with different coordination numbers in proteins with atomic resolution. *Proteins* 75:787–798.
- Wang X, et al. (2010) Analysis and prediction of calcium-binding pockets from apo-protein structures exhibiting calcium-induced localized conformational changes. *Protein Sci* 19:1180–1190.
- Jones LM, et al. (2008) Rational design of a novel calcium-binding site adjacent to the ligand-binding site on CD2 increases its CD48 affinity. *Protein Sci* 17:439–449.
- Maniccia AW, Yang W, Li SY, Johnson JA, Yang JJ (2006) Using protein design to dissect the effect of charged residues on metal binding and protein stability. *Biochemistry* 45:5848–5856.
- Barondeau DP, Kassmann CJ, Tainer JA, Getzoff ED (2002) Structural chemistry of a green fluorescent protein Zn biosensor. *J Am Chem Soc* 124:3522–3524.
- Li S, et al. (2008) Rational design of a conformation-switchable  $\text{Ca}^{2+}$ - and  $\text{Tb}^{3+}$ -binding protein without the use of multiple coupled metal-binding sites. *FEBS J* 275:5048–5061.
- Bizzarri AR, Cannistraro S (2007) Statistical analysis of intensity fluctuations in single molecule SERS spectra. *Phys Chem Chem Phys* 9:5315–5319.
- Zou J, et al. (2007) Developing sensors for real-time measurement of high  $\text{Ca}^{2+}$  concentrations. *Biochemistry* 46:12275–12288.
- Abbruzzetti S, et al. (2005) Kinetics of acid-induced spectral changes in the GFPmut2 chromophore. *J Am Chem Soc* 127:626–635.
- Fukuda H, Arai M, Kuwajima K (2000) Folding of green fluorescent protein and the cycle3 mutant. *Biochemistry* 39:12025–12032.
- Miyawaki A, et al. (1997) Fluorescent indicators for  $\text{Ca}^{2+}$  based on green fluorescent proteins and calmodulin. *Nature* 388:882–887.
- Rudolf R, Magalhães PJ, Pozzan T (2006) Direct in vivo monitoring of sarcoplasmic reticulum  $\text{Ca}^{2+}$  and cytosolic cAMP dynamics in mouse skeletal muscle. *J Cell Biol* 173:187–193.
- Huang CY (1982) Determination of binding stoichiometry by the continuous variation method: The Job plot. *Methods Enzymol* 87:509–525.
- Delaglio F, et al. (1995) NMRPipe: A multidimensional spectral processing system based on UNIX pipes. *J Biomol NMR* 6:277–293.
- Liu Y, Prestegard JH (2008) Direct measurement of dipole-dipole/CSA cross-correlated relaxation by a constant-time experiment. *J Magn Reson* 193:23–31.
- Lee HW, et al. (2002) Isolated EF-loop III of calmodulin in a scaffold protein remains unpaired in solution using pulsed-field-gradient NMR spectroscopy. *Biochim Biophys Acta* 1598:80–87.
- Wang Z-M, Messi ML, Renganathan M, Delbono O (1999) Insulin-like growth factor-1 enhances rat skeletal muscle L-type  $\text{Ca}^{2+}$  channel function by activating gene expression. *J Physiol* 516:331–341.
- Jiménez-Moreno R, Wang ZM, Messi ML, Delbono O (2010) Sarcoplasmic reticulum  $\text{Ca}^{2+}$  depletion in adult skeletal muscle fibres measured with the biosensor D1ER. *Pflugers Arch* 459:725–735.
- Payne AM, Jimenez-Moreno R, Wang ZM, Messi ML, Delbono O (2009) Role of  $\text{Ca}^{2+}$ , membrane excitability, and  $\text{Ca}^{2+}$  stores in failing muscle contraction with aging. *Exp Gerontol* 44:261–273.
- Tsien RY, Pozzan T (1989) Measurement of cytosolic free  $\text{Ca}^{2+}$  with quin2. *Methods Enzymol* 172:230–262.
- Bryant DT, Andrews P (1984) High-affinity binding of  $\text{Ca}^{2+}$  to bovine alpha-lactalbumin in the absence and presence of EGTA. *Biochem J* 220:617–620.
- Ziman AP, Ward CW, Rodney GG, Lederer WJ, Bloch RJ (2010) Quantitative measurement of  $\text{Ca}^{2+}$  in the sarcoplasmic reticulum lumen of mammalian skeletal muscle. *Biophys J* 99:2705–2714.





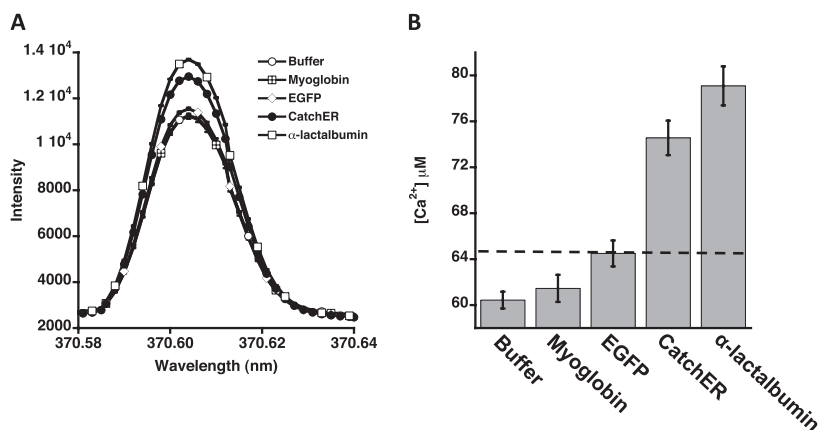

**Fig. S3.** Ca<sup>2+</sup> binding CatchER investigated by equilibrium dialysis and an inductively coupled plasma optical emission spectrometer (ICP-OES). Dialysis tubes contained 6 mL of myoglobin (Sigma Chemical Co.) (non-Ca<sup>2+</sup>-binding protein), EGFP (non-Ca<sup>2+</sup>-binding protein), CatchER, and  $\alpha$ -lactalbumin (Sigma Chemical Co.) [Ca<sup>2+</sup>-binding protein with reported  $K_d = 10^{-9}$  M (24)] at a concentration of 20  $\mu$ M determined before dialysis, floating inside a beaker containing 1,800 mL of 10 mM Tris buffer with Ca<sup>2+</sup> (pH 7.4). The ICP-OES provides a sensitive method of determining the total concentration of a particular metal in solution with high selectivity. (A) Representative spectra of the ICP-OES to determine the total Ca<sup>2+</sup> concentration (both bound and unbound) outside the dialysis tube (buffer) and inside the dialysis tube with the samples of myoglobin, EGFP, CatchER, and  $\alpha$ -lactalbumin, respectively, with maximal intensity at 370.602 nm. Each spectrum is the average of three time repeats with the error bars, and the amplitude of peak intensity of each sample represents the concentration of Ca<sup>2+</sup>. (B) Comparison of Ca<sup>2+</sup> concentration of each sample determined by the ICP-OES. The peak intensities recorded at 396.847, 373.690, 219.779, 370.602, 317.933, 643.907, and 220.861 nm were converted to Ca<sup>2+</sup> concentration calibrated by the predetermined Ca<sup>2+</sup> standard linear curve at each wavelength, respectively. The Ca<sup>2+</sup> concentration of the buffer outside the dialysis tube was 60.4  $\pm$  0.7  $\mu$ M (unbound), and that inside the dialysis tube (both bound and unbound), containing myoglobin, EGFP, CatchER, and  $\alpha$ -lactalbumin, was 61.5  $\pm$  1.2, 64.5  $\pm$  1.1, 74.6  $\pm$  1.5, and 79.1  $\pm$  1.7  $\mu$ M (both bound and unbound), respectively.

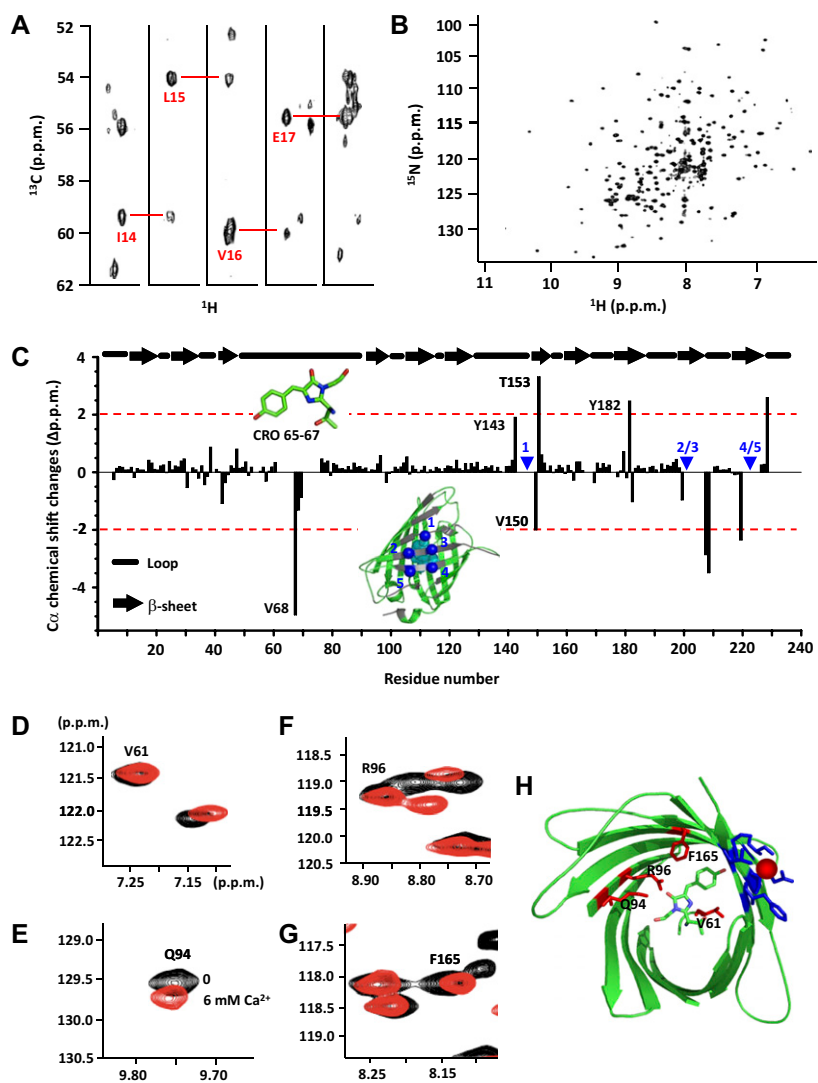

**Fig. S4.** CatchER NMR assignment and subtle  $Ca^{2+}$  influence on the residues interacting with the chromophore on the opposite side of the designed  $Ca^{2+}$  binding site. (A) Selected CatchER 3D HNCA spectra from I14 to E17, with sequential and intrasidial  $C\alpha$ - $C\alpha$  connections indicated by red lines. (B) CatchER 2D  $\{^1H$ - $^{15}N\}$  HSQC spectrum. (C) Difference in  $C\alpha$  chemical shift between published data (1) and our data. Most labeled residues exhibiting more than a 1.5-ppm chemical shift difference were sequentially close to the chromophore or the designed  $Ca^{2+}$  binding site (blue). The numbers 1–5 represent E147, D202, E204, E223, and E225, respectively. Unassigned CatchER residues are gray in the structure. All the data were recorded at 37 °C using an 800-MHz NMR spectrometer with a cryogenic probe and a 300-mM  $^{13}C$ - $^{15}N$  double-labeled sample in 10 mM Tris (pH 7.4). (D–G) CatchER 2D  $\{^1H$ - $^{15}N\}$  HSQC spectrum recorded at 0 mM  $Ca^{2+}$  (black) and 6 mM  $Ca^{2+}$  (red). A subtle chemical shift change was observed for Q94 at 6 mM  $Ca^{2+}$ , but no change was observed for R96, F165, or V61. (H) Side chains of R96, Q94, F165, and V61 (red) protruded toward the chromophore (green sticks) on the opposite side of the designed  $Ca^{2+}$  binding site (blue). All data were recorded at 37 °C using a 600-MHz NMR spectrometer with a 300- $\mu$ M  $^{15}N$ -labeled sample in 10 mM Tris and 10 mM KCl (pH 7.4).

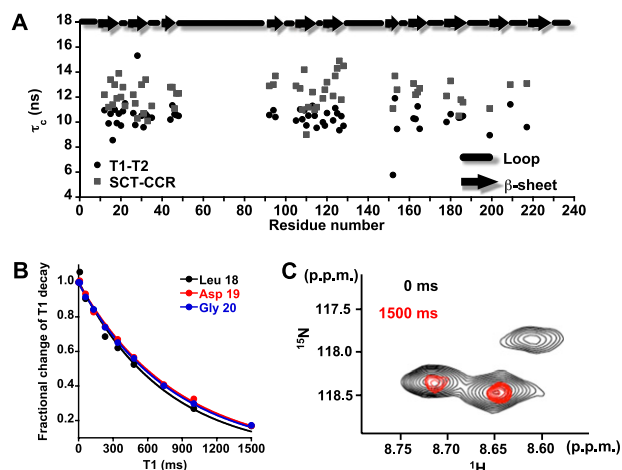

**Fig. 55.** Monomerization of CatchER is supported by the measured rotational correlation time,  $\tau_c$ , with high-field NMR spectroscopy. (A)  $\tau_c$  directly determined by the shared, constant-time, cross-correlated relaxation (SCT-CCR) experiment performed on an 800-MHz NMR spectrometer (gray squares) or calculated using Eqs. S16 and S17 with relaxation times  $T_1$  and  $T_2$  determined on a 600-MHz NMR spectrometer (●) (SI Materials and Methods). The secondary structures of corresponding residues are marked above. (B) Representative fitting of peak integrations collected at 0-, 30-, 60-, 100-, 240-, 480-, 720-, 1,000-, and 1,500-ms  $T_1$  delays. (C) Overlay of  $T_1$  delay spectra from selected region: 0 ms (black), 1,500 ms (red).

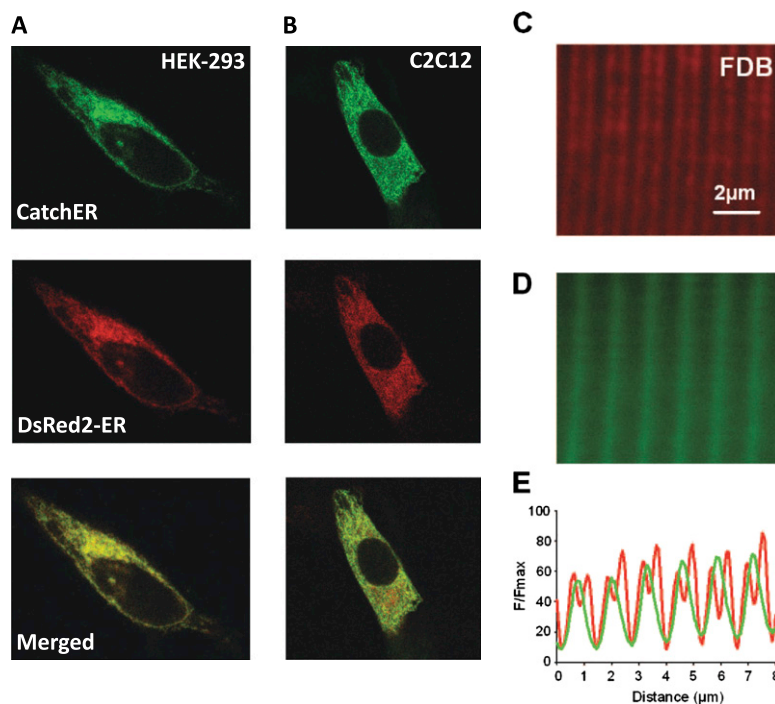

**Fig. 56.** Localization of CatchER expressed in the ER of HEK-293 and C2C12 cells and the SR of FDB fibers. Colocalization of CatchER and DsRed2-ER (BD Biosciences, Clontech) in HEK-293 (A) and C2C12 (B) cells. CatchER (green) and DsRed2-ER (red) were transiently cotransfected and expressed in two cell lines for confocal microscopy imaging. The overlay imaging shows the colocalization of CatchER corresponding to ER-tracker DsRed2-ER. Fiber expressing CatchER stained with di-8-ANEPPS [one of the ANEP (AminoNaphthyEthylyPyridinium) class of membrane potential dyes] and imaged with a confocal microscope (C) shows a striation pattern corresponding to the t-tubule. (D) CatchER fluorescence. (E) Normalized fluorescence intensity profiles for CatchER and di-8-ANEPPS measured in the area shown in D.
